# Supplementary material
Source: PubMed Central journal article supplement (PMC4432491)
Supplement: Supp_Figure2.pdf [file Supp_Figure2.pdf]

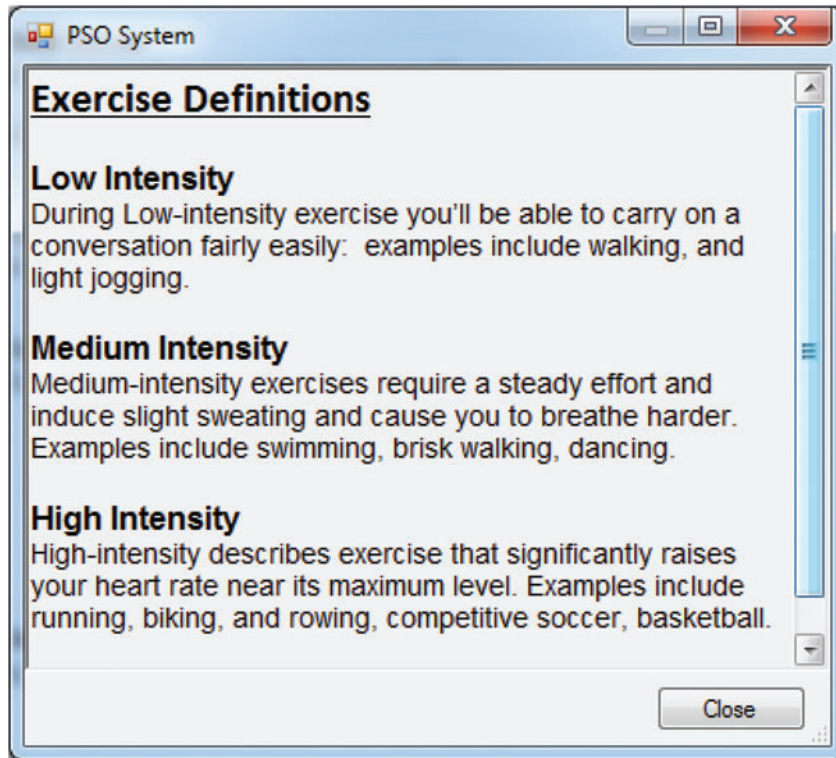

**SUPPLEMENTARY FIG. S2.** Exercise definitions presented when a subject clicks the “help” button in the exercise question (#5) in Figure S1.
